# Supplementary material for: Pattern of Clinical Progression Until Metastatic Castration-Resistant Prostate Cancer: An Epidemiological Study from the European Prostate Cancer Registry
Source: Springer Nature journal article supplement (doi:10.1007/s11523-022-00899-6), 2022-07-01
Supplement: MOESM1 [file 23274848]

## Supplementary data

### Pattern of clinical progression until metastatic castration resistant prostate cancer: an epidemiological study from the European Prostate Cancer Registry

#### Running title: Pattern of clinical progression until metastatic castration resistant prostate cancer

#### Authors

Camille Verry<sup>1\*</sup>, Sébastien Vincendeau<sup>2</sup>, Marc Massetti<sup>3</sup>, Martin Blachier<sup>3</sup>, Alexandre Vimont<sup>3</sup>, Marie-Laure Bazil<sup>4</sup>, Pauline Bernardini<sup>4</sup>, Ségolène Pettré<sup>4</sup>, Marc-Olivier Timsit<sup>5</sup>

#### Affiliations

<sup>1</sup> Department of Radiotherapy, Grenoble Alpes University Hospital, Grenoble, France

<sup>2</sup> Department of Urology, Saint-Grégoire Private Hospital, Saint-Grégoire, France

<sup>3</sup> Public Health Expertise, Paris, France

<sup>4</sup> Janssen-Cilag, Issy les Moulineaux, France

<sup>5</sup> Department of Urology, Hôpital Européen Georges Pompidou, Université de Paris, Paris, France

#### \*Corresponding author contact information

Dr Camille Verry MD, PhD

+ 336 84 73 50 42

+ 334 76 76 54 35

[cverry@chu-grenoble.fr](mailto:cverry@chu-grenoble.fr)

ORCID 0000-0002-9362-7624

#### Additional authors information

- Camille VERRY, M.D., Ph.D., [CVerry@chu-grenoble.fr](mailto:CVerry@chu-grenoble.fr)
- Sébastien VINCENDEAU M.D., [svincendeau@vivalto-sante.com](mailto:svincendeau@vivalto-sante.com)
- Marc MASSETTI, PharmD, MSc, [marc.massetti@ph-expertise.com](mailto:marc.massetti@ph-expertise.com)
- Martin BLACHIER, M.D., [martin.blachier@ph-expertise.com](mailto:martin.blachier@ph-expertise.com)
- Alexandre VIMONT, MSc, [alexandre.vimont@ph-expertise.com](mailto:alexandre.vimont@ph-expertise.com)
- Marie-Laure BAZIL, PharmD., Ph.D., [mbazil@its.jnj.com](mailto:mbazil@its.jnj.com)
- Pauline BERNARDINI, PharmD., [pbernar2@its.jnj.com](mailto:pbernar2@its.jnj.com)
- Ségolène PETTRÉ, Ph.D, [spettre@its.jnj.com](mailto:spettre@its.jnj.com)
- Marc-Olivier Timsit, M.D., Ph.D., [marc-olivier.timsit@aphp.fr](mailto:marc-olivier.timsit@aphp.fr)

**Table S1 Year of mCRPC diagnosis and country of origin**

|                                | K-nmCRPC-mCRPC  | K-mHSPC-mCRPC    | K-mCRPC          | mHSPC-mCRPC      | Total            |
|--------------------------------|-----------------|------------------|------------------|------------------|------------------|
| <b>Year of mCRPC diagnosis</b> |                 |                  |                  |                  |                  |
| < 2010                         | 6 (2.0%)        | 22 (2.2%)        | 22 (2.9%)        | 23 (2.9%)        | 73 (2.6%)        |
| 2010                           | 15 (5.1%)       | 21 (2.1%)        | 15 (2.0%)        | 18 (2.3%)        | 69 (2.4%)        |
| 2011                           | 16 (5.4%)       | 49 (4.9%)        | 32 (4.2%)        | 23 (2.9%)        | 120 (4.2%)       |
| 2012                           | 30 (10.1%)      | 89 (8.9%)        | 70 (9.1%)        | 80 (10.0%)       | 269 (9.4%)       |
| 2013                           | 71 (24.0%)      | 234 (23.5%)      | 150 (19.6%)      | 172 (21.5%)      | 627 (21.9%)      |
| 2014                           | 100 (33.8%)     | 316 (31.7%)      | 261 (34.1%)      | 259 (32.4%)      | 936 (32.7%)      |
| 2015                           | 57 (19.3%)      | 264 (26.5%)      | 216 (28.2%)      | 220 (27.5%)      | 757 (26.5%)      |
| 2016                           | 1 (0.3%)        | 2 (0.2%)         | 0                | 5 (0.6%)         | 8 (0.3%)         |
| <b>Country of Origin</b>       |                 |                  |                  |                  |                  |
| AUT                            | 4 (1%)          | 16 (2%)          | 21 (3%)          | 9 (1%)           | 50 (2%)          |
| BEL                            | 25 (8%)         | 85 (9%)          | 52 (7%)          | 56 (7%)          | 218 (8%)         |
| CHE                            | 1 (0%)          | 12 (1%)          | 7 (1%)           | 6 (1%)           | 26 (1%)          |
| DEU                            | <b>86 (29%)</b> | <b>68 (7%)</b>   | <b>87 (11%)</b>  | <b>131 (16%)</b> | <b>372 (13%)</b> |
| ESP                            | <b>34 (11%)</b> | <b>70 (7%)</b>   | <b>47 (6%)</b>   | <b>33 (4%)</b>   | <b>184 (6%)</b>  |
| FRA                            | <b>37 (13%)</b> | <b>109 (11%)</b> | <b>127 (17%)</b> | <b>80 (10%)</b>  | <b>353 (12%)</b> |
| GBR                            | <b>43 (15%)</b> | <b>118 (12%)</b> | <b>98 (13%)</b>  | <b>151 (19%)</b> | <b>410 (14%)</b> |
| ISR                            | 7 (2%)          | 12 (1%)          | 13 (2%)          | 17 (2%)          | 49 (2%)          |
| ITA                            | <b>20 (7%)</b>  | <b>210 (21%)</b> | <b>121 (16%)</b> | <b>99 (12%)</b>  | <b>450 (16%)</b> |
| LUX                            | 0               | 6 (1%)           | 7 (1%)           | 1 (0%)           | 14 (0%)          |
| POL                            | 5 (2%)          | 89 (9%)          | 46 (6%)          | 54 (7%)          | 194 (7%)         |
| PRT                            | 11 (4%)         | 34 (3%)          | 36 (5%)          | 28 (4%)          | 109 (4%)         |
| RUS                            | 4 (1%)          | 50 (5%)          | 27 (4%)          | 37 (5%)          | 118 (4%)         |
| SVN                            | 0               | 16 (2%)          | 10 (1%)          | 5 (1%)           | 31 (1%)          |
| SWE                            | <b>16 (5%)</b>  | <b>73 (7%)</b>   | <b>46 (6%)</b>   | <b>48 (6%)</b>   | <b>183 (6%)</b>  |
| TUR                            | 3 (1%)          | 29 (3%)          | 21 (3%)          | 45 (6%)          | 98 (3%)          |

**Table S2 Overall Survival: Multivariate analysis adjusted on diagnosis sequence, period and clinical meaningful variables at diagnosis**

| Parameter           | DF                                  | Parameter Estimate | Standard Error | Chi-Square | Pr > ChiSq | Hazard Ratio | 95% Likelihood | HR CL        |
|---------------------|-------------------------------------|--------------------|----------------|------------|------------|--------------|----------------|--------------|
| <b>Sequence</b>     | K-nmCRPC-mCRPC                      | Ref.               | 0.10080        | 0.5254     | 0.4685     | <b>0.930</b> | 0.765          | 1.136        |
|                     | K-mCRPC                             | -0.07307           | 0.09894        | 5.6587     | 0.0174     | <b>0.790</b> | <b>0.653</b>   | <b>0.962</b> |
|                     | K-mHSPC-mCRPC                       | -0.23536           | 0.10660        | 5.2372     | 0.0221     | <b>0.784</b> | <b>0.637</b>   | <b>0.968</b> |
|                     | mHSPC-mCRPC                         | -0.24396           | 0.10660        | 5.2372     | 0.0221     | <b>0.784</b> | <b>0.637</b>   | <b>0.968</b> |
| <b>year_2014</b>    | <b>&gt;2014</b>                     | 0.15384            | 0.06945        | 4.9066     | 0.0268     | <b>1.166</b> | <b>1.017</b>   | <b>1.335</b> |
| <b>ECOG</b>         | <b>0</b>                            | Ref.               | 0.06182        | 7.5349     | 0.0061     | <b>1.185</b> | <b>1.050</b>   | <b>1.338</b> |
|                     | <b>1</b>                            | 0.16969            | 0.10407        | 15.2861    | <.0001     | <b>1.502</b> | <b>1.221</b>   | <b>1.836</b> |
|                     | <b>2</b>                            | 0.40687            | 0.22012        | 29.6234    | <.0001     | <b>3.314</b> | <b>2.095</b>   | <b>4.985</b> |
|                     | <b>3</b>                            | 1.19805            | 0.22012        | 29.6234    | <.0001     | <b>3.314</b> | <b>2.095</b>   | <b>4.985</b> |
| <b>AGE</b>          | <b>65-69</b>                        | Ref.               | 0.09659        | 0.2936     | 0.5879     | <b>0.949</b> | 0.785          | 1.147        |
|                     | <b>&lt; 65</b>                      | -0.05234           | 0.09664        | 5.2668     | 0.0217     | <b>0.801</b> | <b>0.663</b>   | <b>0.969</b> |
|                     | <b>70-74</b>                        | -0.22179           | 0.09664        | 5.2668     | 0.0217     | <b>0.801</b> | <b>0.663</b>   | <b>0.969</b> |
|                     | <b>&gt;=75</b>                      | 0.09397            | 0.08429        | 1.2427     | 0.2649     | <b>1.099</b> | 0.933          | 1.298        |
| <b>Gleason</b>      | <b>9+</b>                           | Ref.               | 1.00718        | 0.0601     | 0.8063     | <b>0.781</b> | 0.044          | 3.524        |
|                     | <b>2</b>                            | -0.24701           | 0.31599        | 1.7305     | 0.1884     | <b>0.660</b> | 0.335          | 1.169        |
|                     | <b>3</b>                            | -0.41567           | 0.33630        | 0.0353     | 0.8509     | <b>1.065</b> | 0.520          | 1.962        |
|                     | <b>4</b>                            | 0.06321            | 0.26784        | 0.0002     | 0.9891     | <b>1.004</b> | 0.568          | 1.636        |
|                     | <b>5</b>                            | 0.00367            | 0.10784        | 0.5030     | 0.4782     | <b>0.926</b> | 0.748          | 1.141        |
|                     | <b>6</b>                            | -0.07648           | 0.07406        | 18.2382    | <.0001     | <b>0.729</b> | <b>0.631</b>   | <b>0.843</b> |
|                     | <b>7</b>                            | -0.31630           | 0.08385        | 10.6361    | 0.0011     | <b>0.761</b> | <b>0.645</b>   | <b>0.896</b> |
|                     | <b>8</b>                            | -0.27347           | 0.08385        | 10.6361    | 0.0011     | <b>0.761</b> | <b>0.645</b>   | <b>0.896</b> |
| <b>Bone lesions</b> | <b>0 lesion</b>                     | Ref.               | 0.13708        | 0.1560     | 0.6929     | <b>1.056</b> | 0.807          | 1.381        |
|                     | <b>1 lesion</b>                     | 0.05414            | 0.14888        | 7.2784     | 0.0070     | <b>1.494</b> | <b>1.114</b>   | <b>1.999</b> |
|                     | <b>2 lesions</b>                    | 0.40167            | 0.13151        | 1.4565     | 0.2275     | <b>1.172</b> | 0.906          | 1.519        |
|                     | <b>3-4 lesions</b>                  | 0.15872            | 0.12315        | 11.2145    | 0.0008     | <b>1.510</b> | <b>1.189</b>   | <b>1.928</b> |
|                     | <b>5-9 lesions</b>                  | 0.41240            | 0.12714        | 15.6708    | <.0001     | <b>1.654</b> | <b>1.291</b>   | <b>2.127</b> |
|                     | <b>10-20 lesions</b>                | 0.50331            | 0.12834        | 21.7129    | <.0001     | <b>1.819</b> | <b>1.416</b>   | <b>2.344</b> |
|                     | <b>&gt;20 lesions</b>               | 0.59801            | 0.42780        | 8.6797     | 0.0032     | <b>3.527</b> | <b>1.398</b>   | <b>7.633</b> |
|                     | <b>Not Evaluable</b>                | 1.26037            | 0.11545        | 16.8716    | <.0001     | <b>1.607</b> | <b>1.285</b>   | <b>2.022</b> |
|                     | <b>Present, nb unknown</b>          | 0.47419            | 0.11545        | 16.8716    | <.0001     | <b>1.607</b> | <b>1.285</b>   | <b>2.022</b> |
|                     | <b>Number of Previous mCRPC trt</b> | <b>0</b>           | Ref.           | 0.07422    | 21.6519    | <.0001       | <b>1.413</b>   | <b>1.220</b> |
| <b>1</b>            |                                     | 0.34538            | 0.10603        | 33.7685    | <.0001     | <b>1.852</b> | <b>1.498</b>   | <b>2.271</b> |
| <b>2</b>            |                                     | 0.61614            | 0.15557        | 32.3997    | <.0001     | <b>2.424</b> | <b>1.765</b>   | <b>3.252</b> |
| <b>3</b>            |                                     | 0.88554            | 0.31624        | 19.1699    | <.0001     | <b>3.993</b> | <b>2.024</b>   | <b>7.077</b> |
| <b>4</b>            |                                     | 1.38460            | 1.01059        | 0.1185     | 0.7307     | <b>1.416</b> | 0.080          | 6.461        |
| <b>5</b>            |                                     | 0.34789            | 1.01059        | 0.1185     | 0.7307     | <b>1.416</b> | 0.080          | 6.461        |

**Table S3 Progression-Free Survival: Multivariate analysis adjusted on diagnosis sequence, period and clinical meaningful variables at diagnosis**

| Parameter                    |                     | DF | Parameter Estimate | Standard Error | Chi-Square | Pr > ChiSq | Hazard Ratio | 95% Likelihood CL | HR           |
|------------------------------|---------------------|----|--------------------|----------------|------------|------------|--------------|-------------------|--------------|
| Sequence                     | K-nmCRPC-mCRPC      |    | Ref.               |                |            |            |              |                   |              |
|                              | K-mCRPC             | 1  | -0.11318           | 0.10087        | 1.2588     | 0.2619     | <b>0.893</b> | 0.735             | 1.091        |
|                              | K-mHSPC-mCRPC       | 1  | -0.17280           | 0.09860        | 3.0712     | 0.0797     | <b>0.841</b> | 0.695             | 1.024        |
|                              | mHSPC-mCRPC         | 1  | -0.23189           | 0.10640        | 4.7501     | 0.0293     | <b>0.793</b> | <b>0.645</b>      | <b>0.979</b> |
| AGE                          | 65-69               |    | Ref.               |                |            |            |              |                   |              |
|                              | < 65                | 1  | -0.11941           | 0.09582        | 1.5529     | 0.2127     | <b>0.887</b> | 0.736             | 1.071        |
|                              | 70-74               | 1  | -0.36531           | 0.09526        | 14.7055    | 0.0001     | <b>0.694</b> | <b>0.576</b>      | <b>0.837</b> |
|                              | >=75                | 1  | -0.12606           | 0.08427        | 2.2377     | 0.1347     | <b>0.882</b> | 0.749             | 1.042        |
| Bone lesions                 | 0 lesion            |    | Ref.               |                |            |            |              |                   |              |
|                              | 1 lesion            | 1  | 0.05108            | 0.14120        | 0.1309     | 0.7175     | <b>1.052</b> | 0.798             | 1.388        |
|                              | 2 lesions           | 1  | 0.27150            | 0.15086        | 3.2388     | 0.0719     | <b>1.312</b> | 0.974             | 1.761        |
|                              | 3-4 lesions         | 1  | 0.22550            | 0.13434        | 2.8177     | 0.0932     | <b>1.253</b> | 0.963             | 1.632        |
|                              | 5-9 lesions         | 1  | 0.31656            | 0.12440        | 6.4757     | 0.0109     | <b>1.372</b> | <b>1.078</b>      | <b>1.756</b> |
|                              | 10-20 lesions       | 1  | 0.53123            | 0.12862        | 17.0588    | <.0001     | <b>1.701</b> | <b>1.324</b>      | <b>2.193</b> |
|                              | >20 lesions         | 1  | 0.46560            | 0.13121        | 12.5912    | 0.0004     | <b>1.593</b> | <b>1.234</b>      | <b>2.064</b> |
|                              | Not Evaluable       | 1  | 1.17657            | 0.39620        | 8.8190     | 0.0030     | <b>3.243</b> | <b>1.355</b>      | <b>6.558</b> |
|                              | Present, nb unknown | 1  | 0.48660            | 0.11822        | 16.9423    | <.0001     | <b>1.627</b> | <b>1.294</b>      | <b>2.058</b> |
| Number of Previous mCRPC trt | 0                   | 1  | Ref.               |                |            |            |              |                   |              |
|                              | 1                   | 1  | 0.39215            | 0.07072        | 30.7479    | <.0001     | <b>1.480</b> | <b>1.287</b>      | <b>1.698</b> |
|                              | 2                   | 1  | 0.62446            | 0.10188        | 37.5662    | <.0001     | <b>1.867</b> | <b>1.522</b>      | <b>2.271</b> |
|                              | 3                   | 1  | 0.58743            | 0.15392        | 14.5649    | 0.0001     | <b>1.799</b> | <b>1.314</b>      | <b>2.405</b> |
|                              | 4                   | 1  | 0.98855            | 0.30640        | 10.4095    | 0.0013     | <b>2.687</b> | <b>1.385</b>      | <b>4.656</b> |
|                              | 5                   | 1  | 0.63284            | 1.00609        | 0.3957     | 0.5293     | <b>1.883</b> | 0.107             | 8.463        |
